# Supplementary material for: Integrated Strategies for Aedes aegypti Control Applied to Individual Houses: An Approach to Mitigate Vectorial Arbovirus Transmission
Source: MDPI journal article supplement (doi:10.3390/tropicalmed9030053), 2024-02-24
Supplement: s1 [file s1]

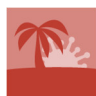

Article

**Integrated Strategies for *Aedes aegypti* Control Applied to Individual Houses: An Approach to Mitigate Vectorial Arbovirus Transmission**

**Table S1.** Description of the reagents used for samples of *Aedes aegypti* and *Culex quinquefasciatus* in the RT-qPCR *singleplex* reaction for ZIKV detection.

| Reagent                            | Concentration | Measure (μL) |
|------------------------------------|---------------|--------------|
| H2O                                | -             | 1,15         |
| QuantiNova Probe RT-PCR Master Mix | 2x            | 5,0          |
| Primer ZIKV1163c                   | 100 μM        | 0,08         |
| Primer ZIKV1087                    | 100 μM        | 0,08         |
| Probe FAM - ZIKV                   | 25 μM         | 0,04         |
| QuantiNova ROX™                    | 200 x         | 0,05         |
| QuantiNova RT Mix                  | 100 x         | 0,1          |
| RNA                                |               | 3,5          |
| Final measure                      | -             | 10           |

**Table S2.** - Description of the reagents used for samples of *Aedes aegypti* in the RT-qPCR *duplex* reaction for CHIKV and DENV detection. .

| Reagent                            | Concentration | Measure (μL) |
|------------------------------------|---------------|--------------|
| H2O                                | -             | 0,95         |
| QuantiNova Probe RT-PCR Master Mix | 2x            | 5,0          |
| Primer CHIKV 6856                  | 100 μM        | 0,08         |
| Primer CHIKV 6981                  | 100 μM        | 0,08         |
| Probe VIC - CHIKV                  | 25 μM         | 0,04         |
| Primer DENV G Fw                   | 100 μM        | 0,08         |
| Primer DENV G Rv                   | 100 μM        | 0,08         |
| Probe Cy5 - DENV                   | 25 μM         | 0,04         |
| QuantiNova ROX™                    | 200 x         | 0,05         |
| QuantiNova RT Mix                  | 100 x         | 0,1          |
| ARN                                |               | 3,5          |
| Final measure                      | -             | 10           |

**Table S3.** - Description of the primers and probes used in the RT-qPCR reactions.

| Primer/Probe      | 5' – 3'                         |
|-------------------|---------------------------------|
| Primer ZIKV1163c  | CCACTAACGTTCTTTTGCAGACAT        |
| Primer ZIKV1087   | CCGCTGCCCAACACAAG               |
| Primer CHIKV 6856 | TCA CTC CCT GTT GGA CTT GAT AGA |
| Primer CHIKV 6981 | TTG ACG AGA GTT AGG AAC ATA CC  |
| Primer DENV G Fw  | AAGGACTAGAGGTTAGAGGAGACCC       |
| Primer DENV G Rv  | CGTTCTGTGCCTGGAATGATG           |
| Probe FAM – ZIKV  | AGCCTACCTTGACAAGCAGTCAGACACTCAA |
| Probe VIC - CHIKV | AGGTACGCGCTTCAAGTTCGGCG         |
| Probe Cy5 - DENV  | AACAGCATATTGACGCTGGGAGAGACCAGA  |
